## Erratum

**Navarro-Lérida, I., Álvarez-Barrientos, A. and Rodríguez-Crespo, I.** (2006). N-terminal palmitoylation within the appropriate amino acid environment conveys on NOS2 the ability to progress along the intracellular sorting pathways. *J. Cell Sci.* 119, 1558-1596.

We apologise that the e-press version of this article indicated the existence of supplementary material, whereas this article has none. The online and print versions are correct.
